# Supplementary material
Source: PubMed Central journal article supplement (PMC6124527)
Supplement: jciinsight-3-96672-s175.pdf [file jciinsight-3-96672-s175.pdf]

## **Supplementary Information**

### **Spatial and Temporal Variations in Hemodynamic Forces Regulate Cardiac Trabecular**

#### **Initiation and Consequent Contractile Function**

Juhyun Lee<sup>1,2\*</sup>, Vijay Vedula<sup>3\*</sup>, Kyung In Baek<sup>2\*</sup>, Junjie Chen<sup>2</sup>, Jeffrey J. Hsu<sup>1</sup>, Yichen Ding<sup>1</sup>,  
Chih-Chiang Chang<sup>2</sup>, Hanul Kang<sup>4</sup>, Peng Fei<sup>5</sup>, Cheng-ming Chuong<sup>6</sup>, Rongsong Li<sup>1</sup>, René R.  
Sevag Packard<sup>1, 4</sup>, Alison L. Marsden<sup>3</sup>, Tzung K. Hsiai<sup>1,2,4,7</sup>

<sup>1</sup>Division of Cardiology, Department of Medicine, UCLA, Los Angeles, CA

<sup>2</sup>Department of Bioengineering, UCLA, Los Angeles, CA

<sup>3</sup>Department of Pediatrics and Bioengineering, Stanford University, Stanford, CA

<sup>4</sup>Division of Cardiology, VA Greater Los Angeles Healthcare System, Los Angeles, CA

<sup>5</sup>School of Optical and Electronic Information, Huazhong University of Science and Technology,  
Wuhan, Hubei, China

<sup>6</sup>Department of Pathology, University of Southern California, Los Angeles, CA

<sup>7</sup>Medical Engineering, California Institute of Technology, Pasadena, CA

\*These authors contributed equally to this work.

Corresponding Author:

Tzung K. Hsiai, M.D., Ph.D.

Department of Medicine and Bioengineering

University of California, Los Angeles

Los Angeles, CA 90073

Email: [thsiai@mednet.ucla.edu](mailto:thsiai@mednet.ucla.edu)

Telephone: 310-268-3839

Fax: 310-268-4288

**Supplementary materials:**

|                 |                                                                                    |
|-----------------|------------------------------------------------------------------------------------|
| <b>Fig. S1</b>  | Sequential Notch in WT zebrafish from confocal mircoscopy                          |
| <b>Fig. S2</b>  | NICD mRNA injection to control zebrafish                                           |
| <b>Fig. S3</b>  | Pulse-wave (PW) Doppler image of adult wild type zebrafish                         |
| <b>Video S1</b> | Registration of 4-D beating heart with segmented fluid domain                      |
| <b>Video S2</b> | 4-D WSS profile of WT zebrafish                                                    |
| <b>Video S3</b> | 4-D streamline traces of WT zebrafish heart                                        |
| <b>Video S4</b> | Cardiomyocytes proliferation of WT zebrafish at 5 dpf                              |
| <b>Video S5</b> | Cardiomyocytes proliferation of gata1a MO injected zebrfish at 5 dpf               |
| <b>Video S6</b> | Cardiomyocytes proliferation of rescue zebrafish with NICD mRNA injection at 5 dpf |

**Fig. S1**

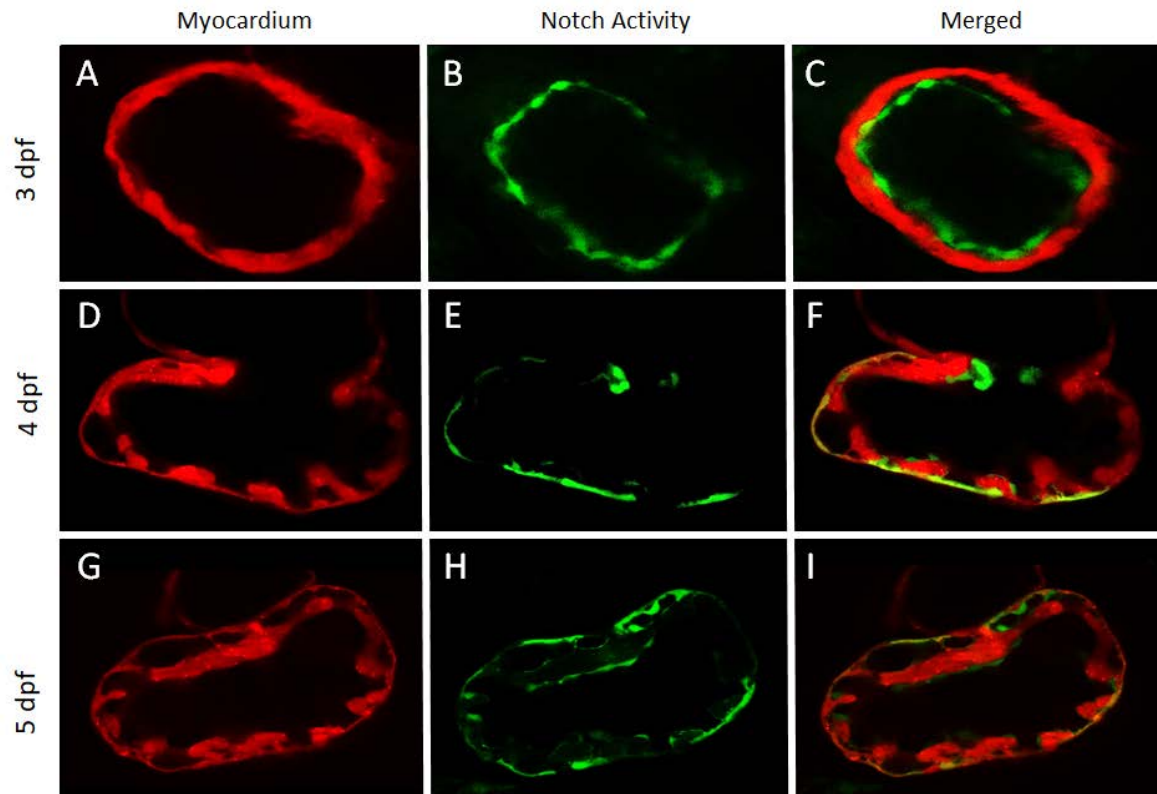

**Fig. S1.** Sequential Notch in WT zebrafish from confocal microscopy. (A-C) At 3 dpf, Tp1 signal, Notch promoter, activity initially resided in the endocardial layer and AV canal. (D-F) At 4 dpf, Notch activity appeared to be more prominent in the epicardium than in the endocardium. Epicardial Tp1 signal and trabecular ridges were organizing into an interspersed pattern. (G-H) As trabeculae developed to form a network structure, Notch activity was prominent in both the epi- and endocardium. Notch activity was absent in the myocardium.

**Fig. S2**

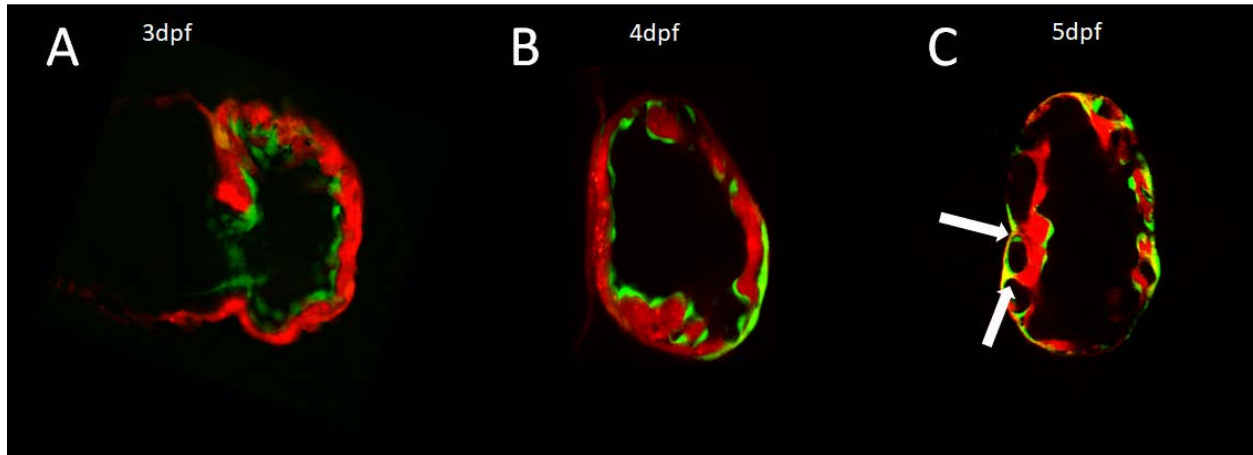

**Fig. S2. NICD mRNA injection to WT zebrafish *Tg(cmlc:mcheery;tp1:gfp)*.** (A) At 3dpf, tp1 signal was initially expressed in endocardium as other groups. However, ventricular thickness was thicker than WT. (B) At 4 dpf, ventricle was over trabeculated and Notch activity was shown in both endocardium and myocardium. (C) Large amount of myocardium was separated from ventricular wall and form a trabecular network by interconnecting with thin bridges (arrow).

**Fig. S3**

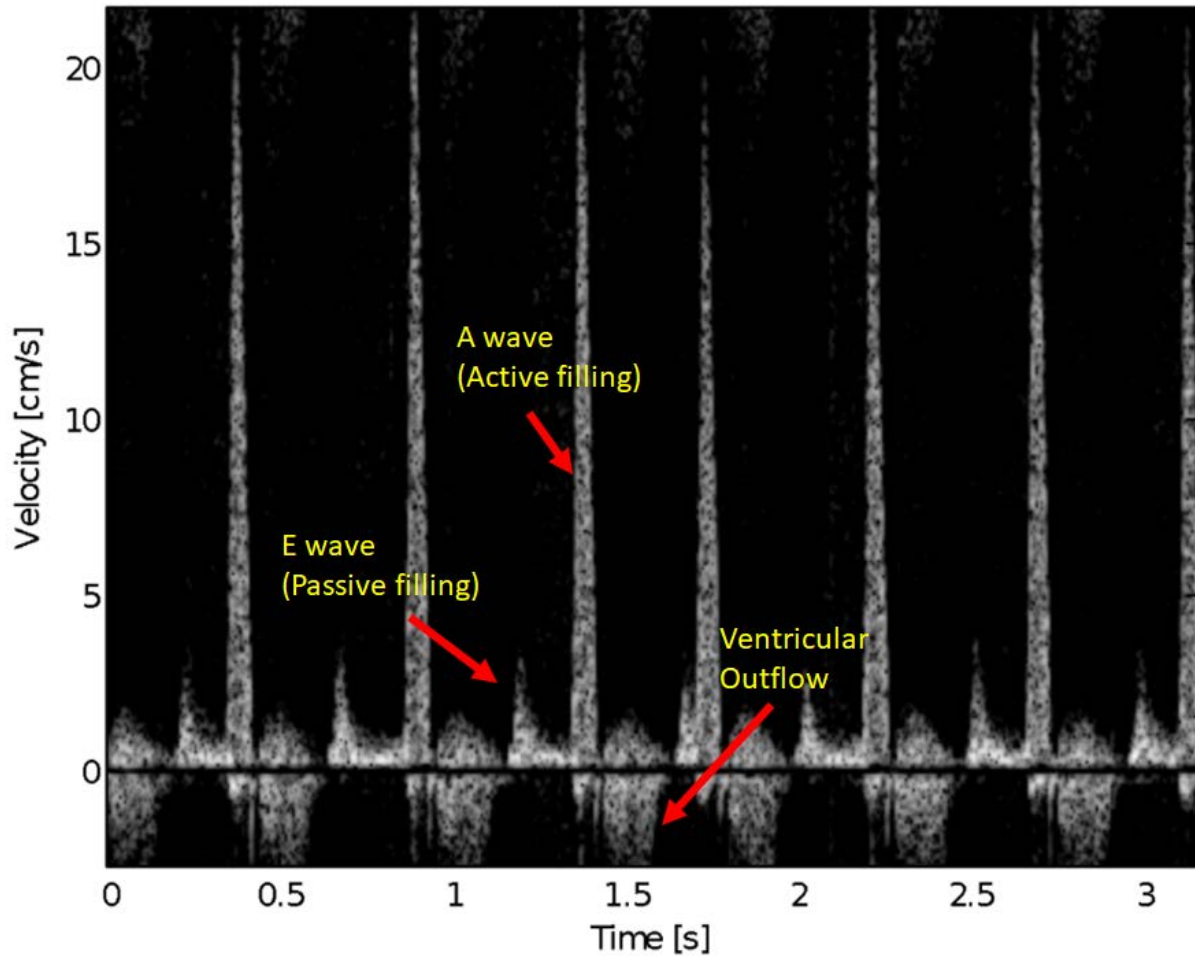

**Fig. S3. Pulse-wave (PW) Doppler image of adult wild type zebrafish.** PW Doppler provides assessment of passive filling of the ventricle (early [E]-wave velocity) and active filling during atrial systole (atrial [A]-wave velocity). Unlike in human hearts, atrial contraction (A-wave) is stronger than passive filling by ventricular relaxation, therefore, E/A ratio is  $< 1$  at baseline. For *wea* mutant, A-wave would be negligible due to lack to atrial contraction.

### **Supplementary Video Legends**

Video S1. Registration of 4-D beating heart with segmented fluid domain.

Video S2. 4-D WSS profile of WT zebrafish

Video S3. 4-D streamline traces of WT zebrafish heart

Video S4. Cardiomyocytes proliferation of WT zebrafish at 5 dpf

Video S5. Cardiomyocytes proliferation of gata1a MO injected zebrafish at 5 dpf

Video S6. Cardiomyocytes proliferation of rescue zebrafish with NICD mRNA injection at 5 dpf
